# Supplementary material for: Integrating beyond the Surface: Conceptual Disambiguation and Conversational Learning for Shared Meaning-Making in Interdisciplinary Teamwork
Source: Research Square preprint supplement (doi:10.21203/rs.3.rs-5931528/v1), 2025-07-18
Supplement: Supplementary file 1 [file 2730ebd69b15af1a447d1f2d.docx]

**Supplementary information**

**Table 1**: Overview of course activities and facilitation strategies that we implemented in [name of the course]

| **Week** | **Meeting content and activities** | **Additional facilitation strategies, if applicable** |
| --- | --- | --- |
| 1 | Kick-off and course introduction (planned)  Introduction of the course, its goals, schedule, and get-to-know-each-other |  |
| 2 | **Pitches of individual projects (planned)**  Each student gave a few minute pitch of their project (rationale, research question, concepts and theories, methods) that they prepared prior to the meeting | In order to stimulate engagement with each other’s presentations, every student had to write down at least one clarification question for each presentation. After each presentation one student was called upon to pose their question. We also gave examples of clarification questions, in order to show how simple questions can be and that we also do not know everything, aiming at normalizing not-knowing [censored reference #2] |
| 3 | **Exploration of differences and similarities between projects (planned but adjusted reactively)**  Students brainstormed in groups of two or three about the differences and similarities between their individual projects. | In order to stimulate thinking beyond similarities and differences in topics (a tendency we observed), fields of application, methods, and sectors, we provided the students with several ‘conceptual lenses’ that may guide their discussions. We carried out this activity in two rounds, in two different group compositions. For the first round we put students together with similar backgrounds and projects, for the second round we teamed up students with the most distant backgrounds and projects to challenge them to think creatively and go beyond the ‘usual suspects’. |
| 4 | **Journal club (planned)**  In preparation for the meeting, each student shared an academic article from their field and/or project and in subgroups (that we composed) read each other’s contributions. During the meeting they discussed the content of the papers together. | In order to stimulate an interactive discussion, we used Jamboard slides to guide the discussion. We structured the discussion in two stages: (1) summarizing (on digital sticky notes) what they considered the main messages from the papers they read and checking those understandings with each other; (2) posing ‘why’-questions about the papers that they read, to further understand the approaches and assumptions of other fields. |
| 5 | Frame Reflection Lab (FRL) part 1 (planned)  Interactive discussion of disciplinary differences, values and assumptions (steps 1-3) (see censored reference #3] |  |
| 6 | **Development of RQs** and prepare SV meeting (planned)  Open discussion of research questions that students have been working and preparation of the supervisor meeting in week 7 |  |
| 7 | Supervisor meeting (planned)  Students presented their project plan to [name of the course] teacher and their thesis supervisors |  |
| 8 | **Revise RQs (reactive)**  We considered the students’ research questions underdeveloped and reactively decided to dedicate the meeting to revising them. We also set collaboration ground rules for collaboration in response to low commitment and investment we observed | In response to the observation that students shared little from their own projects and their joint research questions lacked theoretical grounding, we had students share the main concepts and frameworks of their individual projects in the chat as a starting point for discussion. |
| 9 | **Further refining RQs (reactive)**  In response to the observation that the students struggled to formulate their research questions, we devoted another meeting to defining and refining them. | In response to the observed persistent struggle with defining the research questions, we shifted towards a slightly more directive approach. The teacher conducted one-on-one meetings with the students to get a better grasp of their individual projects to be able to give more specific pointers. During the meeting, the teacher invited students to share particular concepts and frameworks based on those one-on-one discussions and possible connections, thereby more explicitly feeding some partial answers. We also gave more direction by dividing the students into two subgroups with more closely related projects and instructing them to define research questions in those subgroups. |
| 10 | Frame Reflection Lab part 2 and peer feedback (planned)  We completed the FRL activity (Horn et al., step 4) and students gave each other peer feedback |  |
| 11 | Check in; feedback to research questions (reactive)  Short check-in meeting while students work on their project |  |
| 12 | **Start framework building (reactive)**  We started building an integrative theoretical framework, based on their individual concepts and frameworks, in the research questions. They did so in the two subgroups of the research questions, in order to first build to “sub-frameworks”. | On individual slides on Jamboard the students visualized the conceptualizations of their individual projects. They shared those upfront and students studied each other’s slides prior to the meeting, to make sure that their individual projects and corresponding concepts and frameworks were explicitly fed into the discussion. The subsequent discussion was organized in two phases: (1) posing clarification questions about each other’s concepts and framework; (2) discussing how their concepts relate to each other. We stressed that relationships do not necessarily mean similarities, but can also be affecting each other, sharing a similar cause, being at tension with each other, in response to our observation that their discussions tended to focus on similarities. |
| 13 | No meeting |  |
| 14 | **Questioning & substantiating framework (reactive)**  The students viewed the other subgroup’s framework and formulated questions about the choices that were made. In the subgroups they discuss those questions. We implemented this activity in response to the observation that the choices about their framework often seemed unsubstantiated. | We took explicit time during the meeting to formulate questions, which students posted in the chat. The teacher gave examples of questions, showing how to be critical but at the same time humble (not dismissing choices made by others, but openly addressing the ‘why’), and stressed that questions can be about concepts (e.g. terminology, presence or absence of certain concepts) or connections (e.g. presence/ absence, direction). For the discussions in subgroups, the students were instructed to discuss the questions openly and non-defensively and to substantiate their answers with examples from literature, empirics, or argumentation. The teacher gave some examples. They were instructed that their answers may, but do not have to, lead to adjusting the framework. |
| 15 | **Check-in meeting: Feedback to framework (reactive)**  Short check-in meeting in which students received feedback on the next iteration of their framework that they had been working on among themselves. | The teacher explicitly took a questioning approach in order to stimulate students to open up their discussions and think about the framework. |
| 16 | **Joint coding exercise (planned)**  For each of the two topic-based subgroups, one student shared an interview transcript. Everyone coded that interview with concepts from their integrative theoretical framework, prior to the meeting. During the meeting they discussed their codings. We planned this activity upfront, although its timing was decided based on the students’ progress.  In parallelAsynchronously, outside the classroom, the students defined a Specific, Measurable, Attainable, Relevant and Time-bound (SMART) learning goal and a learning protocol with a behavioral intervention aimed at developing towards this learning goal. They handed this in to the teachers and received feedback on it before they could continue to implement their proposed behavioral intervention. | The students prepared the meeting upfront in order to ensure that they spent substantial time engaging with the concepts and data. We instructed the students and explicitly gave them a bigger role in guiding their own discussions, in order to increase ownership. Teachers attended both subgroups, but only stepped in when necessary. |
| 17 | Translate map into outline for report (reactive)  We provided feedback on their revised framework and guided a discussion to translate the framework into an outline for their report. | With the end of the course nearing, we stressed the urgency to start writing. Moreover, we became a bit more directive in how to approach writing the report, for instance by discussing the report rubrics and putting the discussion of an outline on the agenda, in which we also fed some suggestions. |
| 18 | **Present preliminary findings (reactive)**  The students presented to each other preliminary findings from their individual projects and how those related to the joint project. | In response to the observation that the joint discussions often lacked some specificity from the empirics of the individual projects and the students seemed to have limited knowledge of each other’s project findings, we implemented another round of presentations to stimulate knowledge sharing. This time the presentations focused on their preliminary findings. In order to stimulate engagement with each other’s contributions, we instructed the students to take notes during the presentations of things that stood out to them, what they recognized, what surprised them, and what raised questions. |
| 19 | Preparation of event and presentation (planned)  We discussed the main points and task division for the presentation the following week. |  |
| 20 | End event (planned)  Students presented their findings to the supervisors of their theses, other interested researchers, and interested non-academic actors. For more information see Tijma et al. [(2023)](https://www.zotero.org/google-docs/?wwJPKJ). |  |
| 21 | Feedback on report (planned)  We provided feedback on a draft version of their report, so they could revise and finalize it for submission. |  |
